# Supplementary material for: Multi-level storylines for participatory modeling – involving marginalized communities in Tz'olöj Ya', Mayan Guatemala
Source: Copernicus journal article supplement (doi:10.5194/hess-25-1283-2021), 2021-03-15
Supplement: Supplementary file [file hess-25-1283-2021-supplement-title-page.pdf › hess-25-1283-2021-supplement-title-page.pdf]

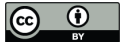

*Supplement of*

**Multi-level storylines for participatory modeling – involving marginalized communities in Tz’olöj Ya’, Mayan Guatemala**

**Jessica A. Bou Nassar et al.**

*Correspondence to:* Jessica A. Bou Nassar ([jessica.bounassar@mail.mcgill.ca](mailto:jessica.bounassar@mail.mcgill.ca))

- [hess-25-1283-2021-supplement-title-page.pdf](#)
- [supplementary\\_files](#)
  - [.DS\\_Store](#)
  - [full\\_conceptual\\_model\\_hess.2mdl](#)
  - [full\\_conceptual\\_model\\_hess.mdl](#)

The copyright of individual parts of the supplement might differ from the article licence.
